# Supplementary material
Source: Research Square preprint supplement (doi:10.21203/rs.3.rs-9517131/v1)
Supplement: Supplementary file 1 [file e1f0c606c182f945d5ca682e.docx]

**SUPPLEMENTARY MATERIALS**

**Supplementary Table 1. Bivariate association between baseline characteristics and clinical improvement (CGI and MHGS scales)**

| **Variable & Category** | **CGI not improved (n= 98)** | **CGI improved (n= 434)** | **CGI p-value** | **MHGS not improved (n= 148)** | **MHGS improved (n= 367)** | **MHGS p-value** |
| --- | --- | --- | --- | --- | --- | --- |
| **Age at session (mean, SD; median, IQR)** | 29.3 (12.5); 29.5 (21–39) | 29.7 (13.3); 30 (19–40) | 0.78 | 28.8 (13.7); 28 (17.5–40) | 30.3 (12.8); 31 (22–39) | 0.25 |
| **Age group** |  |  | 0.38 |  |  | 0.11 |
| ≤15 years (Children) | 16 (15.7%) | 86 (84.3%) |  | 34 (37.4%) | 57 (62.6%) |  |
| 16–19 years (Adolescents) | 6 (20.7%) | 23 (79.3%) |  | 8 (27.6%) | 21 (72.4%) |  |
| 20–24 years (Young adults) | 15 (26.3%) | 42 (73.7%) |  | 20 (34.5%) | 38 (65.5%) |  |
| ≥25 years (Adults) | 61 (17.7%) | 283 (82.3%) |  | 86 (25.5%) | 251 (74.5%) |  |
| **Gender** |  |  | 0.04 |  |  | 0.42 |
| Female | 43 (16.0%) | 226 (84.0%) |  | 73 (27.9%) | 189 (72.1%) |  |
| Male | 54 (22.4%) | 187 (77.6%) |  | 71 (30.7%) | 160 (69.3%) |  |
| Other | 1 (4.6%) | 21 (95.4%) |  | 4 (18.2%) | 18 (81.8%) |  |
| **Education level** |  |  | 0.75 |  |  | 0.51 |
| Secondary | 17 (17.5%) | 80 (82.5%) |  | 30 (32.6%) | 62 (67.4%) |  |
| College | 21 (15.9%) | 111 (84.1%) |  | 31 (23.8%) | 99 (76.2%) |  |
| Illiterate | 11 (20.4%) | 43 (79.6%) |  | 16 (29.1%) | 39 (70.9%) |  |
| Primary | 32 (18.2%) | 144 (81.8%) |  | 46 (27.7%) | 120 (72.3%) |  |
| University | 16 (23.5%) | 52 (76.5%) |  | 23 (34.3%) | 44 (65.7%) |  |
| **Country (Mexican yes/no)** |  |  | 0.94 |  |  | 0.09 |
| Mexican | 5 (17.9%) | 23 (82.1%) |  | 12 (42.9%) | 16 (57.1%) |  |
| Not Mexican | 93 (18.4%) | 411 (81.6%) |  | 136 (27.9%) | 351 (72.1%) |  |
| **Clinical diagnosis** |  |  | 0.34 |  |  | 0.006 |
| Post-Traumatic Stress Disorder | 57 (16.7%) | 284 (83.3%) |  | 80 (23.9%) | 255 (76.1%) |  |
| Depression | 18 (27.3%) | 48 (72.7%) |  | 23 (35.4%) | 42 (64.6%) |  |
| Anxiety disorder | 5 (15.6%) | 27 (84.4%) |  | 9 (29.0%) | 22 (71.0%) |  |
| Psychotic and Bipolar disorder | 1 (50.0%) | 1 (50.0%) |  | 1 (50.0%) | 1 (50.0%) |  |
| Adjustment disorder | 9 (18.4%) | 40 (81.6%) |  | 14 (32.6%) | 29 (67.4%) |  |
| Other / Unspecified | 8 (20.5%) | 31 (79.5%) |  | 19 (52.8%) | 17 (47.2%) |  |
| **Baseline CGI Severity** |  |  | 0.04 |  |  | <0.001 |
| Mild (1–3 points) | 21 (26.3%) | 59 (73.8%) |  | 35 (49.3%) | 36 (50.7%) |  |
| Moderate (4 points) | 26 (13.6%) | 165 (86.4%) |  | 61 (32.6%) | 126 (67.4%) |  |
| Severe (5–7 points) | 51 (19.8%) | 206 (80.2%) |  | 52 (20.6%) | 201 (79.4%) |  |
| **Main event group** |  |  | 0.14 |  |  | 0.007 |
| Sexual violence | 16 (12.7%) | 110 (87.3%) |  | 27 (22.0%) | 96 (78.0%) |  |
| Torture | 13 (31.0%) | 29 (69.0%) |  | 19 (45.2%) | 23 (54.8%) |  |
| Kidnapping | 18 (17.5%) | 85 (82.5%) |  | 21 (20.6%) | 81 (79.4%) |  |
| Other forms of violence / GBV | 41 (18.1%) | 185 (81.9%) |  | 67 (30.9%) | 150 (69.1%) |  |
| Separation / Loss & family context | 5 (33.3%) | 10 (66.7%) |  | 6 (46.1%) | 7 (53.9%) |  |
| Medical / antecedents | 2 (25.0%) | 6 (75.0%) |  | 4 (50.0%) | 4 (50.0%) |  |
| Other events | 2 (20.0%) | 8 (80.0%) |  | 4 (50.0%) | 4 (50.0%) |  |
| **Time since event** |  |  | 0.92 |  |  | 0.13 |
| ≤1 week | 1 (16.7%) | 5 (83.3%) |  | 2 (33.3%) | 4 (66.7%) |  |
| 1–12 weeks | 28 (17.4%) | 133 (82.6%) |  | 33 (21.0%) | 124 (79.0%) |  |
| 4-12 months | 32 (19.7%) | 130 (80.3%) |  | 51 (32.1%) | 108 (67.9%) |  |
| > 1 year | 33 (17.1%) | 160 (82.9%) |  | 56 (30.3%) | 129 (69.7%) |  |
| **Pre-existing psychotropics (yes/no)** |  |  | 0.13 |  |  | 0.04 |
| Yes | 17 (13.8%) | 106 (86.2%) |  | 26 (21.5%) | 95 (78.5%) |  |
| No | 81 (19.8%) | 328 (80.2%) |  | 122 (31.0%) | 272 (69.0%) |  |
| **Psychotropics during MH care (yes/no)** |  |  | 0.03 |  |  | <0.001 |
| Yes | 62 (16.1%) | 322 (83.9%) |  | 89 (23.5%) | 289 (76.5%) |  |
| No | 36 (24.3%) | 112 (75.7%) |  | 59 (43.1%) | 78 (56.9%) |  |
| **Patient referred (yes/no)** |  |  | 0.08 |  |  | 0.02 |
| Yes | 49 (15.9%) | 259 (84.1%) |  | 71 (23.6%) | 230 (76.4%) |  |
| No | 49 (21.9%) | 175 (78.1%) |  | 77 (36.0%) | 137 (64.0%) |  |
| **Type of session** |  |  | 0.90 |  |  | 0.52 |
| Family / Couple | 4 (17.4%) | 19 (82.6%) |  | 5 (22.7%) | 17 (77.3%) |  |
| Individual | 94 (18.5%) | 415 (81.5%) |  | 143 (29.0%) | 350 (71.0%) |  |
| **Intervention** |  |  | 0.21 |  |  | <0.001 |
| SOIT Family | 24 (22.6%) | 82 (77.4%) |  | 43 (44.8%) | 53 (55.2%) |  |
| SOIT Patient | 74 (17.4%) | 352 (82.6%) |  | 105 (25.0%) | 314 (75.0%) |  |
| **Number of sessions (Mean, IQR)** | 6.2 (2–8) | 17.6 (8–22) | <0.001 | 11.1 (4–13) | 17.7 (7–22) | <0.001 |
| **Number of sessions** |  |  | <0.001 |  |  | <0.001 |
| ≤3 sessions | 46 (63.9%) | 26 (36.1%) |  | 35 (56.5%) | 27 (43.5%) |  |
| 4–6 sessions | 22 (29.3%) | 53 (70.7%) |  | 28 (38.9%) | 44 (61.1%) |  |
| 7–10 sessions | 12 (12.5%) | 84 (87.5%) |  | 30 (31.6%) | 65 (68.4%) |  |
| 11–20 sessions | 16 (9.9%) | 145 (90.1%) |  | 37 (23.4%) | 121 (76.6%) |  |
| >20 sessions | 2 (1.6%) | 126 (98.4%) |  | 18 (14.1%) | 110 (85.9%) |  |
| Table 2 presents the bivariate associations between demographic characteristics, clinical profiles, exposure to violent events, treatment-related factors, and improvement according to two outcome measures: CGI Improvement and MHGS Improvement. For some variables, the row totals are lower than the overall sample size (CGI n = 532; MHGS n = 515) due to missing data in the corresponding explanatory variable. For each variable, the table shows the distribution of improved versus not improved patients (n, %), together with the corresponding p-values from χ² tests for categorical variables, t-tests for normally distributed continuous variables, and Wilcoxon rank-sum tests for non-normal continuous variables. Percentages reflect row proportions. Age and number of sessions are also summarized with means, standard deviations, medians, and interquartile ranges as appropriate. | | | | | | |

**Supplementary Table 2. Logistic regression model predicting MHGS improvement (final model)**

| **Predictor** | **OR** | **95% CI** | **p-value** |
| --- | --- | --- | --- |
| **Gender (ref: Female)** |  |  |  |
| Male | 1.15 | 0.73–1.79 | 0.548 |
| Other | 0.98 | 0.30–3.15 | 0.968 |
| **Age group (ref: ≥25 years)** |  |  |  |
| ≤15 years (Children) | 0.78 | 0.43–1.41 | 0.409 |
| 16–19 years (Adolescents) | 0.90 | 0.35–2.32 | 0.822 |
| 20–24 years (Young adults) | 0.74 | 0.39–1.42 | 0.361 |
| **Clinical diagnosis (ref: Anxiety disorder)** |  |  |  |
| PTSD | 0.94 | 0.50–1.77 | 0.852 |
| Depression | 1.05 | 0.43–2.56 | 0.908 |
| Other disorders | 0.71 | 0.37–1.38 | 0.313 |
| **Baseline CGI Severity (ref: Mild–Moderate)** |  |  |  |
| Severe | **1.75** | **1.11–2.75** | **0.016** |
| **Main event group (ref: Sexual violence)** |  |  |  |
| Torture | **0.37** | **0.16–0.84** | **0.018** |
| Kidnapping | 1.26 | 0.63–2.53 | 0.509 |
| Other forms of violence | 0.88 | 0.49–1.57 | 0.666 |
| Other events | 0.47 | 0.18–1.24 | 0.126 |
| **Number of sessions (ref: ≤3 sessions)** |  |  |  |
| 4–6 sessions | **2.30** | **1.10–4.77** | **0.026** |
| 7–10 sessions | **2.97** | **1.48–5.96** | **0.002** |
| 11–20 sessions | **4.20** | **2.17–8.11** | **<0.001** |
| >20 sessions | **6.81** | **3.23–14.38** | **<0.001** |
| Constant | 0.77 | 0.35–1.68 | 0.510 |
| Outcome: MHGS Improvement (1 = improved, 0 = not improved). Final adjusted multivariable logistic regression model evaluating independent predictors of clinical improvement. Odds ratios (OR) with 95% confidence intervals (CI) are shown. The model adjusted for gender, age group, clinical diagnosis, baseline CGI severity, type of traumatic event, and session category. Model calibration was adequate (Hosmer–Lemeshow p = 0.32), and discrimination was acceptable (AUC = 0.72). | | | |

**Supplementary Table 3. Cox proportional hazards model for time to clinical improvement (CGI)**

| **Predictor** | **Hazard Ratio (HR)** | **Std. Err.** | **z** | **p-value** | **95% CI** |
| --- | --- | --- | --- | --- | --- |
| **Age group (ref: ≥25 years)** |  |  |  |  |  |
| ≤15 years (Children) | **1.37** | **0.201** | **2.14** | **0.033** | **1.03 – 1.82** |
| 16–19 years (Adolescents) | 0.94 | 0.209 | –0.29 | 0.774 | 0.61 – 1.45 |
| 20–24 years (Young adults) | 1.10 | 0.183 | 0.56 | 0.573 | 0.79 – 1.52 |
| **Clinical diagnosis (ref: Anxiety disorder)** |  |  |  |  |  |
| PTSD | **0.54** | **0.114** | **–2.91** | **0.004** | **0.36 – 0.82** |
| Depression | 0.73 | 0.182 | –1.25 | 0.211 | 0.45 – 1.19 |
| Other disorders | 0.73 | 0.176 | –1.31 | 0.191 | 0.45 – 1.17 |
| **Baseline CGI Severity (ref: Mild–Moderate)** |  |  |  |  |  |
| Severe | **0.80** | **0.085** | **–2.14** | **0.033** | **0.64 – 0.98** |
| Cox proportional hazards regression model evaluating baseline predictors of time to first documented clinical improvement according to the CGI-I scale. Time was defined as the cumulative number of sessions until improvement. The model included age group, clinical diagnosis, and baseline CGI severity. Proportional hazards assumptions were assessed using Schoenfeld residuals and were satisfied for all covariates (global test p = 0.67). Overall model fit was assessed using the likelihood ratio test (LR χ²(7) = 36.24, p < 0.001). HR = hazard ratio; CGI-I = Clinical Global Impression of Improvement. | | | | | |

**Supplementary Figure 2. Kaplan–Meier curves for time to functional improvement according to the MHGS scale**

**
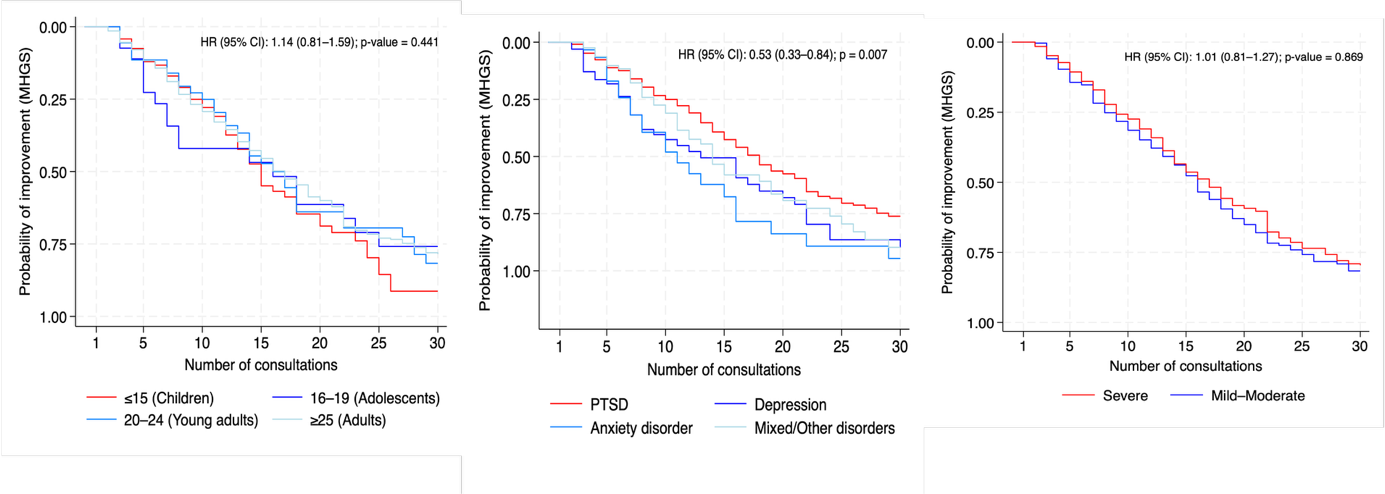
**

Kaplan–Meier curves depict the cumulative probability of functional improvement measured by the Mental Health Global State (MHGS) scale as a function of the number of sessions. Curves are stratified by age group, clinical diagnosis, and baseline clinical severity at intake. Time was defined as the number of sessions until first documented functional improvement. Hazard ratios (HR) shown were derived from Cox proportional hazards regression models. Between-group differences were assessed using log-rank tests. MHGS = Mental Health Global State.

**Supplementary Table 4. Cox proportional hazards model for time to MHGS improvement**

| **Predictor** | **HR** | **95% CI** | **p-value** |
| --- | --- | --- | --- |
| **Age group (ref: ≥25 years)** |  |  |  |
| ≤15 years (Children) | 1.14 | 0.81 – 1.59 | 0.441 |
| 16–19 years (Adolescents) | 0.95 | 0.60 – 1.49 | 0.811 |
| 20–24 years (Young adults) | 1.11 | 0.78 – 1.56 | 0.568 |
| **Clinical diagnosis (ref: Anxiety disorder)** |  |  |  |
| PTSD | **0.53** | **0.33 – 0.84** | **0.007** |
| Depression | 0.76 | 0.45 – 1.29 | 0.307 |
| Other disorders | 0.63 | 0.37 – 1.07 | 0.089 |
| **Baseline CGI Severity (ref: Mild–Moderate)** |  |  |  |
| Severe | 1.01 | 0.81 – 1.27 | 0.869 |
| Cox proportional hazards regression model evaluating baseline predictors of time to first documented functional improvement according to MHGS scores. Time was defined as the cumulative number of sessions until improvement. The model included age group, clinical diagnosis, and baseline CGI severity. Proportional hazards assumptions were assessed using Schoenfeld residuals and were satisfied for all covariates (global test p = 0.69). Overall model fit was evaluated using the likelihood ratio test (LR χ²(7) = 11.02, p = 0.14). HR = hazard ratio; MHGS = Mental Health Global State. | | | |
